# Supplementary material
Source: PubMed Central journal article supplement (PMC2773057)
Supplement: pp.109.142505_1.pdf [file pp.109.142505_1.pdf]

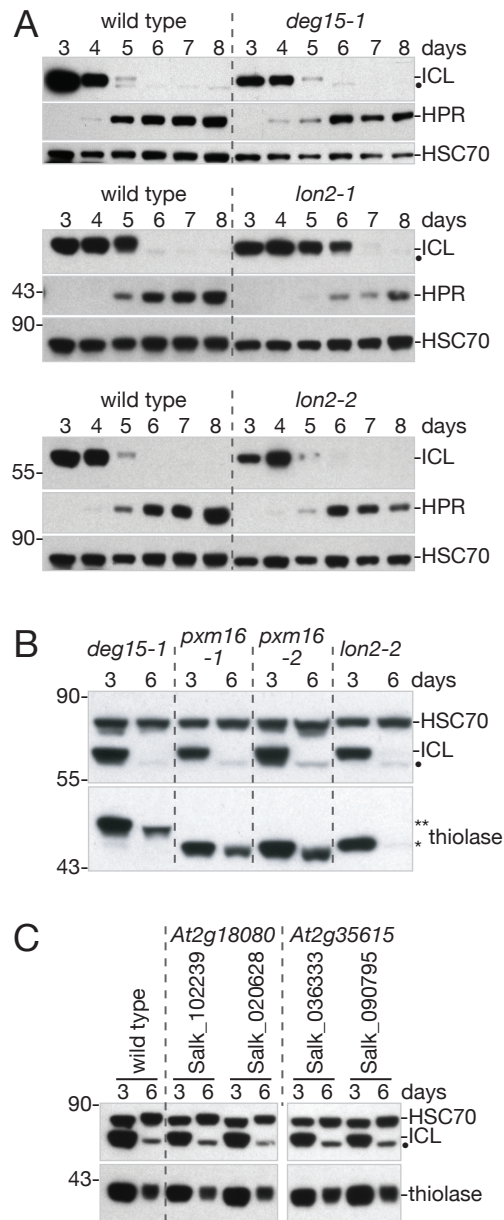

Supplemental Figure 1. The glyoxylate enzyme isocitrate lyase is degraded with near wild-type kinetics in identified putative peroxisomal protease mutants.

(A) Immunoblots of protein extracts from wild-type (Col-0), *deg15-1*, *lon2-1*, and *lon2-2* cotyledons (12 per lane) cut from 3- to 8-day-old light-grown seedlings.

(B) Immunoblot of protein extracts from *deg15-1*, *pxm16-1*, *pxm16-2*, and *lon2-2* cotyledons (12 per lane) from 3- and 6-day-old light-grown seedlings.

(C) Immunoblot of protein extracts from cotyledons of mutants disrupted in putative peroxisomal proteases *At2g18080* and *At2g35615* from 3- and 6-day-old light-grown seedlings. Blots were probed with antibodies raised against isocitrate lyase (ICL), hydroxypyruvate reductase (HPR), PED1 (thiolase), and HSC70. Positions of molecular weight markers (in kDa) are indicated on the left. Processed and unprocessed thiolase are marked by one or two asterisks, respectively, and a filled circle marks the position of a protein that cross-reacts with the ICL antibody but is not found in the *icl* null mutant (Zolman et al., 2005).

**Supplemental Table I.** Primers used to determine mutant genotypes.

| Genotype       | Primers <sup>1</sup>                                                           | Amplicon size (bp)    |
|----------------|--------------------------------------------------------------------------------|-----------------------|
| <i>deg15-1</i> | R005: CCTCCCTGTGGTGATGATTTATGAAGCC<br>LB1-SALK: CAAACCAGCGTGGACCGCTTGCTGCAACTC | 246                   |
| <i>DEG15</i>   | R005: CCTCCCTGTGGTGATGATTTATGAAGCC<br>R006: TGGCCATGAAGTTAGCGTTGTGTG           | 487                   |
| <i>lon2-1</i>  | R008: TTACCATATGGGCCAACACAGTCC<br>LB1-SALK                                     | 278                   |
| <i>lon2-2</i>  | R008: TTACCATATGGGCCAACACAGTCC<br>LB1-SALK                                     | 248                   |
| <i>LON2</i>    | R007: ATTGGCTGCACACCGGTATGGTAT<br>R008: TTACCATATGGGCCAACACAGTCC               | 466                   |
| <i>pxm16-1</i> | R002: ACTTTACGAATCAGTAAGCGATAATCCA<br>LB1-SALK                                 | 378                   |
| <i>PXM16-1</i> | R001: GGGATATATTCATTATACAAATGACGTGGC<br>R002: ACTTTACGAATCAGTAAGCGATAATCCA     | 403                   |
| <i>pxm16-2</i> | R004: GGGTTAGAGCCATCTTGGTGGTAGAA<br>LB1-SALK                                   | 273                   |
| <i>PXM16-2</i> | R003: GGCAGCCATATCACCAAGCAATGT<br>R004: GGGTTAGAGCCATCTTGGTGGTAGAA             | 458                   |
| <i>ped1-96</i> | PED1-16: ATCTGGGCTTCAGGCTGTTGCTGAT<br>PED1-17: TGCCTTTCTGTGCGAGTCAACCTA        | <sup>2</sup> 502      |
| <i>PEDI</i>    | PED1-16: ATCTGGGCTTCAGGCTGTTGCTGAT<br>PED1-17: TGCCTTTCTGTGCGAGTCAACCTA        | <sup>3</sup> 305, 197 |

<sup>1</sup>Primers are given in the 5' to 3' orientation.

<sup>2</sup>The *ped1-96* mutation destroys a *HinP1I* site.

<sup>3</sup>The 502-bp *PEDI* amplicon is cleaved once by *HinP1I*.

**Supplemental Table II.** Accession numbers for LON homologs used in phylogenetic analysis.

| Organism                            | Protein name      | Protein accession number |
|-------------------------------------|-------------------|--------------------------|
| <i>Anaeromyxobacter</i> sp. Fw109-5 | La / Anae109_2098 | YP_001379285             |
| <i>Arabidopsis thaliana</i>         | LON1 / At5g26860  | NP_568490                |
| <i>Arabidopsis thaliana</i>         | LON2 / At5g47040  | NP_568675                |
| <i>Arabidopsis thaliana</i>         | LON3 / At3g05780  | NP_566258                |
| <i>Arabidopsis thaliana</i>         | LON4 / At3g05790  | NP_566259                |
| <i>Caenorhabditis elegans</i>       | C34B2.6           | NP_492796                |
| <i>Danio rerio</i>                  | LONP1             | XP_691712                |
| <i>Danio rerio</i>                  | LONP2             | NP_001008573             |
| <i>Debaryomyces hansenii</i>        | DEHA0G02310g      | XP_461623                |
| <i>Drosophila melanogaster</i>      | CG8798            | NP_649133                |
| <i>Escherichia coli</i>             | La                | YP_003053061             |
| <i>Gallus gallus</i>                | LONP2             | XP_414106                |
| <i>Homo sapiens</i>                 | LONP1             | NP_004784                |
| <i>Homo sapiens</i>                 | LONP2             | NP_113678                |
| <i>Kluyveromyces lactis</i>         | KLLA0B01892g      | XP_451615                |
| <i>Micromonas</i> sp. RCC299        | MICPUN_113675     | ACO63129                 |
| <i>Myxococcus xanthus</i>           | La                | YP_632173                |
| <i>Oryza sativa</i>                 | Os09g0533400      | NP_001063769             |
| <i>Physcomitrella patens</i>        | PHYPADRAFT_161045 | XP_001757793             |
| <i>Pichia angusta</i>               | PLN               | ABB88892                 |
| <i>Pichia pastoris</i>              | PAS_chr1-1_0174   | XP_002489820             |
| <i>Populus trichocarpa</i>          | POPTRDRAFT_827676 | XP_002329591             |
| <i>Saccharomyces cerevisiae</i>     | Pim1p             | NP_009531                |
| <i>Schizosaccharomyces pombe</i>    | LON1              | NP_593035                |
| <i>Yarrowia lipolytica</i>          | YALI0F23595g      | XP_505795                |
